# Supplementary material for: Acoustic metamaterials-driven transdermal drug delivery for rapid and on-demand management of acute disease
Source: PubMed Central journal article supplement (PMC9935629; doi:10.1038/s41467-023-36581-2), 2023-02-16
Supplement: 41467_2023_36581_MOESM2_ESM.pdf [file 41467_2023_36581_MOESM2_ESM.pdf]

## **Description of Additional Supplementary Files**

**File name: Supplementary Movie 1**

**Description:** Simulated 3D acoustic streaming mediated by acoustic materials.

**File name: Supplementary Movie 2**

**Description:** Experimental 3D acoustic streaming mediated by acoustic materials.

**File name: Supplementary Movie 3**

**Description:** Simulated dye release process via acoustic materials.

**File name: Supplementary Movie 4**

**Description:** Experimental dye release process via acoustic materials.

**File name: Supplementary Movie 5**

**Description:** A free-moving mouse with an acoustic metamaterial patch device.
